# Supplementary material for: Modelling debris transport within glaciers by advection in a full-Stokes ice flow model
Source: Copernicus journal article supplement (doi:10.5194/tc-12-189-2018), 2018-01-19
Supplement: Supplementary file [file tc-12-189-2018-supplement-title-page.pdf › tc-12-189-2018-supplement-title-page.pdf]

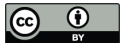

## *Supplement of*

# **Modelling debris transport within glaciers by advection in a full-Stokes ice flow model**

**Anna Wirbel et al.**

*Correspondence to:* Anna Wirbel ([anna.wirbel@uibk.ac.at](mailto:anna.wirbel@uibk.ac.at))

- [tc-12-189-2018-supplement-title-page.pdf](#)
- [supplement\\_3](#)
  - [2D\\_benchmark\\_exp2t15\\_velocity.avi](#)
  - [2d\\_benchmark\\_exp1t20.avi](#)
  - [2d\\_benchmark\\_exp1t200.avi](#)
  - [2d\\_benchmark\\_exp2t15.avi](#)
  - [2d\\_benchmark\\_exp2t150.avi](#)
  - [2d\\_glaciercase.avi](#)
  - [3d\\_benchmark1.avi](#)
  - [supplementary\\_3.pdf](#)

The copyright of individual parts of the supplement might differ from the CC BY 3.0 License.
